# Supplementary material for: A review of MIS 5e sea-level proxies around Japan
Source: Copernicus journal article supplement (doi:10.5194/essd-13-1477-2021), 2021-04-06
Supplement: Supplementary file 1 [file essd-13-1477-2021-supplement.zip]

Archive with 2 entries (2 files):
- essd-13-1477-2021-supplement-title-page.pdf
- Supplement-table.csv
