# Supplementary material for: A review of MIS 5e sea-level proxies around Japan
Source: Copernicus journal article supplement (doi:10.5194/essd-13-1477-2021), 2021-04-06
Supplement: Supplementary file 1 [file essd-13-1477-2021-supplement.zip › essd-13-1477-2021-supplement-title-page.pdf]

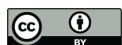

## *Supplement of*

# **A review of MIS 5e sea-level proxies around Japan**

**Evan Tam and Yusuke Yokoyama**

*Correspondence to:* Evan Tam ([evan.tam@g.ecc.u-tokyo.ac.jp](mailto:evan.tam@g.ecc.u-tokyo.ac.jp))

- [essd-13-1477-2021-supplement-title-page.pdf](#)
- [Supplement-table.csv](#)

The copyright of individual parts of the supplement might differ from the article licence.
