# Supplementary material for: A review of MIS 5e sea-level proxies around Japan
Source: Copernicus journal article supplement (doi:10.5194/essd-13-1477-2021), 2021-04-06
Supplement: Supplementary file 1 [file essd-13-1477-2021-supplement.zip › Supplement-table.csv]

Location	Left Bound (Longitude)	Right Bound (Longitude)	Upper Bound (Latitude)	Lower Bound (Latitude)	Average Sea Level Maximum (cm)	Average Sea Level Maximum (m)	Largest Difference from Sea Level Average (cm)	Average RWL (cm)	Average RWL (m)	Average IR (cm)	Average IR (m)	Average Upper Limit (m)	Average Lower Limit (m)
NE Hokkaido 1	142.0589	144.9287	45.7613	43.8613	95.83333333	0.958333333	107	50.40714286	0.504071429	67.92118333	0.679211833	0.843677345	0.164465512
NE Hokkaido 2	144.9287	146.8923	44.6814	43.8171	93	0.93	98	61.805	0.61805	73.795	0.73795	0.987025	0.249075
East Hokkaido Bay	145.1082	146.3433	43.8171	43.3705	131.5	1.315	133	93.65	0.9365	103.5782	1.035782	1.454391	0.418609
Southeast Hokkaido	143.2326	146.5091	43.5326	41.7603	124.2	1.242	118	89.326	0.89326	99.198	0.99198	1.38925	0.39727
Southwestern Hokkaido	140.2469	143.2326	42.7586	41.7759	135.4285714	1.354285714	144	89.802	0.89802	90.27	0.9027	1.34937	0.44667
Northwestern Hokkaido	139.5086	142.0589	45.7371	42.6848	23.33333333	0.233333333	21	11.474	0.11474	19.286	0.19286	0.21117	0.01831
Hokkaido Southwestern Arc	139.1025	140.1883	42.6848	41.2598	25	0.25	32	13.5025	0.135025	22.5775	0.225775	0.2479125	0.0221375
Hokkaido-Honshu Pocket Bay	140.2419	141.2636	41.8888	41.1526	78.75	0.7875	93	61.15	0.6115	72.98	0.7298	0.9764	0.2466
Aomori Bay	140.4787	141.3075	41.1526	40.7796	70	0.7	68	30.83	0.3083	49.0375	0.490375	0.5534875	0.0631125
Tohoku (West)	137.9986	140.4325	41.1526	37.65	28	0.28	30	12.932	0.12932	25.01	0.2501	0.25437	0.00427
Tohoku (East)	141.22	142.4007	41.5689	38.2641	129.5	1.295	119	83.536	0.83536	100.95	1.0095	1.34011	0.33061
Sendai Bay	140.7908	141.4944	38.4516	37.748	141	1.41	141	88.6125	0.886125	110.0675	1.100675	1.4364625	0.3357875
Sendai-Iwaki	140.1832	141.1638	37.748	36.977	128.6666667	1.286666667	120	88.51	0.8851	106.46	1.0646	1.4174	0.3528
Iwaki-chiba	140.1832	141.1638	36.977	34.8686	142.5	1.425	135	87.23	0.8723	105.426	1.05426	1.39943	0.34517
Tokyo Bay	139.5859	140.2928	36.1289	35.3315	185.1666667	1.851666667	153	112.004	1.12004	132.894	1.32894	1.78451	0.45557
Enoshima Bay	138.9675	139.9081	35.3315	34.6264	145.2	1.452	157	93.146	0.93146	117.242	1.17242	1.51767	0.34525
Shizuoka Bay	138.2201	138.9675	35.23	34.6264	156.2	1.562	137	93.486	0.93486	130.8	1.308	1.58886	0.28086
Hamamatsu Coast	136.8793	138.9101	34.751	34.1387	186	1.86	205	91.094	0.91094	118.488	1.18488	1.50338	0.3185
Tokyo Islands	138.74	140.1719	34.6199	32.9579	143.2857143	1.432857143	129	88.318	0.88318	107.026	1.07026	1.41831	0.34805
Nagoya Bay	136.4527	137.3581	35.1766	34.4029	218.6	2.186	197	124.482	1.24482	168.762	1.68762	2.08863	0.40101
Toyama Bay	136.7937	138.9614	37.65	36.6372	17.57142857	0.175714286	24	8.294	0.08294	22.098	0.22098	0.19343	-0.02755
Noto Peninsula West	136.1558	136.7937	37.5742	35.9813	13	0.13	15	6.27	0.0627	22.028	0.22028	0.17284	-0.04744
Kii Peninsula East	135.8135	136.9075	34.368	33.2725	175	1.75	181	98.9525	0.989525	127.51	1.2751	1.627075	0.351975
Kii Peninsula West & Southern Shikoku	132.6057	135.8135	33.9048	32.6408	197.8888889	1.978888889	189	99.5725	0.995725	132.5875	1.325875	1.6586625	0.3327875
Wakayama-Tokushima Semi-Bay	134.5352	135.2548	34.2216	33.807	196	1.96	187	97.27	0.9727	128.9866667	1.289866667	1.617633333	0.327766667
Yamaguchi Western Coast	130.6822	130.9085	34.4811	33.9473	128	1.28	128	57.15	0.5715	83.61	0.8361	0.98955	0.15345
Yamaguchi Northern Coast	130.9085	131.6043	34.6864	34.3253	81	0.81	81	33.23	0.3323	53.04	0.5304	0.5975	0.0671
Western Seto Inland Sea	130.9324	132.6853	34.0843	33.4113	357.2	3.572	289	159.626	1.59626	219.174	2.19174	2.69213	0.50039
Shimane West	131.6043	132.5796	35.4177	34.606	45	0.45	36	13.115	0.13115	36.865	0.36865	0.315475	-0.053175
Tottori, Hyogo, Kyoto	132.5796	136.1558	36.767	35.4008	29.14285714	0.291428571	24	3.9	0.039	22.03	0.2203	0.14915	-0.07115
Osaka Bay	134.8937	135.892	34.7763	34.2216	160.8	1.608	139	80.588	0.80588	104.786	1.04786	1.32981	0.28195
Hiroshima-Fukuyama Bay	132.6057	133.5761	34.6625	33.6105	367.7142857	3.677142857	337	186.844	1.86844	269.594	2.69594	3.21641	0.52047
Himeji Bay	134.3573	134.8937	34.8956	34.2216	159.6	1.596	108	81.922	0.81922	114.984	1.14984	1.39414	0.2443
Okayama-Takamatsu Bay	133.5761	134.3573	34.8956	33.6105	273.25	2.7325	341	163.58	1.6358	248.05	2.4805	2.87605	0.39555
Oita (Kyushu-Shikoku Bay)	131.4607	132.6057	33.4113	33.0251	212	2.12	186	135.71	1.3571	185.045	1.85045	2.282325	0.431875
Tsushima	128.9644	129.7031	34.7686	34.0019	172.3333333	1.723333333	135	79.40333333	0.794033333	124.0733333	1.240733333	1.4144	0.173666667
Kyushu East Coast	131.0212	132.1743	33.0251	31.2066	192	1.92	206	102.0225	1.020225	140.8025	1.408025	1.7242375	0.3162125
Tanegashima Pocket	129.5701	131.3295	31.2066	30.1825	233.5	2.335	256	120.365	1.20365	167.2425	1.672425	2.0398625	0.3674375
Kagoshima Bay	130.5284	130.8612	31.775	31.0726	285.3333333	2.853333333	280	114.726	1.14726	197.99	1.9799	2.13721	0.15731
Southwest Kyushu	129.9037	130.5284	32.1155	31.0726	277.3333333	2.773333333	287	147.194	1.47194	195.902	1.95902	2.45145	0.49243
Kyushu Southwest Islands	128.2534	130.0199	32.1241	31.5662	243	2.43	254	136.515	1.36515	184.655	1.84655	2.288425	0.441875
Gotoh Islands	128.4912	129.2332	33.333	32.4727	272	2.72	288	139.386	1.39386	192.638	1.92638	2.35705	0.43067
Iki Island	129.8685	129.8485	33.9109	33.6567	200.6666667	2.006666667	230	94.08	0.9408	139.0533333	1.390533333	1.636066667	0.245533333
Omura Bay	129.7145	130.0321	33.0574	32.8394	70.5	0.705	74	33.855	0.33855	62.195	0.62195	0.649525	0.027575
Miike Bay Area	130.0698	130.4633	33.2508	32.8186	520	5.2	496	257.14	2.5714	361.8233333	3.618233333	4.380516667	0.762283333
Kumamoto Bay Area	130.1725	130.7714	32.8186	32.5474	475	4.75	496	230.24	2.3024	324.555	3.24555	3.925175	0.679625
Yatsushiro Bay Area	129.9647	130.7028	32.5474	32.1155	348.6666667	3.486666667	296	184.0725	1.840725	253.95	2.5395	3.110475	0.570975
Amakusa Bay	129.6964	130.1725	32.8394	32.5474	313	3.13	351	163.84	1.6384	229.285	2.29285	2.784825	0.491975
Western Kyushu	129.317	129.7145	33.5736	32.8394	284.5	2.845	308	149.65	1.4965	207.855	2.07855	2.535775	0.457225
Sasebo Pocket	129.7145	129.8259	33.2018	33.0574	297	2.97	297	150.54	1.5054	203.42	2.0342	2.5225	0.4883
Hase-Karatsu	129.7145	130.2499	33.6567	33.2601	241	2.41	262	111.185	1.11185	159.41	1.5941	1.9089	0.3148
Fukuoka Bay	130.2499	130.5977	33.6499	33.5422	198	1.98	198	92.13	0.9213	131.01	1.3101	1.57635	0.26625
Northern Kyushu (Fukutsu)	130.2499	130.8235	33.9473	33.6499	146.5	1.465	149	64.15	0.6415	104.415	1.04415	1.163575	0.119425
Nakanoshima-Takerajima	128.628	130.532	30.1825	28.6852	201.5	2.015	215	109.98	1.0998	151.97	1.5197	1.85965	0.33995
Amami-Izenashima	127.4865	130.5354	28.6852	26.9193	187.75	1.8775	170	99.60333333	0.996033333	141.3766667	1.413766667	1.702916667	0.28915
Okinawa	126.3963	131.424	26.9193	25.3929	203.5	2.035	194	105.44	1.0544	146.694	1.46694	1.78787	0.32093
Miyakojima-Yonaguni	122.4681	126.3963	25.3929	23.7983	172.5	1.725	153	91.24	0.9124	127.98	1.2798	1.5523	0.2725
Minamiioshima-chichishimafutami	140	143	28	24	105.4	1.054	96	61.094	0.61094	80.32	0.8032	1.01254	0.20934
